# Supplementary material for: XDM-corrected hybrid DFT with numerical atomic orbitals predicts molecular crystal lattice energies with unprecedented accuracy
Source: Royal Society of Chemistry journal article supplement (doi:10.1039/d2sc05997e), 2022-12-15
Supplement: d2sc05997e3.pdf [file d2sc05997e3.pdf]

# Supplementary Information for: XDM-corrected hybrid DFT with numerical atomic orbitals predicts molecular crystal lattice energies with unprecedented accuracy

Alastair J. A. Price, Alberto Otero de la Roza, and Erin R. Johnson

November 24, 2022

Table S1: Effect of using tight, as opposed to light, geometries for composite calculations for the X23 and ICE13 benchmarks. Results shown are mean absolute errors in the computed lattice energies, in kcal/mol.

| Method                    | X23         |             | ICE13       |             |
|---------------------------|-------------|-------------|-------------|-------------|
|                           | tight@light | tight@tight | tight@light | tight@tight |
| PBE0//PBE (MBD)           | 1.07        | 1.03        | 0.61        | 0.71        |
| PBE0//PBE (XDM)           | 0.96        | 0.94        | 0.30        | 0.33        |
| PBE-50//PBE (XDM)         | 0.87        | 0.86        | 1.16        | 0.98        |
| B86bPBE-25//B86bPBE (XDM) | 0.48        | 0.50        | 0.19        | 0.22        |
| B86bPBE-50//B86bPBE (XDM) | 0.53        | 0.54        | 1.20        | 1.02        |

Table S2: X23 and ICE13 lattice energies, in kcal/mol, computed with selected methods using fully relaxed geometries.

| Name                 | PBE-TS | PBE-TS | HSE06-TS | PBE0-TS |
|----------------------|--------|--------|----------|---------|
|                      | light  | tight  | light    | light   |
| 1,4-cyclohexanedione | 26.382 | 25.460 | 27.081   | 27.031  |
| acetic acid          | 20.391 | 19.687 | 20.622   | 20.454  |
| adamantane           | 26.387 | 26.299 | 26.697   | 26.766  |
| ammonia              | 11.340 | 10.673 | 10.818   | 10.622  |
| anthracene           | 34.536 | 32.506 | 36.219   | 36.261  |
| benzene              | 16.871 | 16.042 | 17.233   | 17.261  |
| CO <sub>2</sub>      | 6.960  | 6.105  | 7.096    | 7.008   |
| cyanamide            | 22.896 | 22.555 | 22.284   | 22.041  |
| cytosine             | 43.105 | 41.426 | 44.001   | 43.735  |
| ethylcarbamate       | 24.607 | 23.838 | 24.791   | 24.595  |
| formamide            | 21.517 | 20.609 | 21.579   | 21.357  |
| hexamine             | 28.913 | 27.590 | 29.335   | 29.342  |
| imidazole            | 25.557 | 24.404 | 25.452   | 25.361  |
| naphthalene          | 25.564 | 24.167 | 26.612   | 26.641  |
| $\alpha$ oxalic acid | 25.696 | 23.970 | 27.008   | 26.684  |
| $\beta$ oxalic acid  | 26.455 | 24.738 | 27.040   | 26.732  |
| pyrazine             | 19.474 | 18.075 | 19.731   | 19.636  |
| pyrazole             | 22.480 | 21.263 | 22.460   | 22.352  |
| succinic acid        | 36.958 | 35.553 | 37.171   | 36.951  |
| triazine             | 17.500 | 16.429 | 17.943   | 17.945  |
| trioxane             | 19.356 | 18.163 | 19.719   | 19.661  |
| uracil               | 37.092 | 35.590 | 38.062   | 37.785  |
| urea                 | 27.354 | 26.824 | 27.683   | 27.345  |
| MAE                  | 4.171  | 3.140  | 4.568    | 4.436   |
| ME                   | 4.166  | 3.060  | 4.568    | 4.434   |
| ice Ih               | 18.248 | 16.675 | 17.003   | 16.650  |
| ice II               | 17.790 | 16.292 | 16.812   | 16.509  |
| ice III              | 17.895 | 16.324 | 16.762   | 16.432  |
| ice IV               | 17.311 | 15.811 | 16.352   | 16.066  |
| ice VI               | 17.290 | 15.814 | 16.357   | 16.081  |
| ice VII              | 15.525 | 14.112 | 14.831   | 14.619  |
| ice VIII             | 15.833 | 14.451 | 15.129   | 14.921  |
| ice IX               | 18.018 | 16.478 | 16.918   | 16.587  |
| ice XI               | 18.322 | 16.746 | 17.071   | 16.717  |
| ice XIII             | 17.733 | 16.233 | 16.728   | 16.426  |
| ice XIV              | 17.613 | 16.112 | 16.620   | 16.327  |
| ice XV               | 17.290 | 15.814 | 16.357   | 16.081  |
| ice XVII             | 17.916 | 16.369 | 16.702   | 16.354  |
| MAE                  | 3.686  | 2.181  | 2.675    | 2.377   |
| ME                   | 3.686  | 2.181  | 2.675    | 2.377   |

Table S3: X23 and ICE13 lattice energies, in kcal/mol, computed with selected methods using fully relaxed geometries.

| Name                 | PBE-MBD | PBE-MBD | HSE06-MBD | PBE0-MBD |
|----------------------|---------|---------|-----------|----------|
|                      | light   | tight   | light     | light    |
| 1,4-cyclohexanedione | 22.918  | 22.092  | 23.829    | 23.755   |
| acetic acid          | 19.070  | 18.397  | 19.277    | 19.106   |
| adamantane           | 19.065  | 19.220  | 19.528    | 19.573   |
| ammonia              | 10.977  | 10.284  | 10.428    | 10.221   |
| anthracene           | 27.533  | 25.671  | 29.708    | 29.737   |
| benzene              | 13.842  | 13.084  | 14.498    | 14.503   |
| CO <sub>2</sub>      | 6.514   | 5.636   | 6.769     | 6.694    |
| cyanamide            | 22.564  | 22.225  | 21.911    | 21.660   |
| cytosine             | 40.337  | 38.730  | 41.265    | 40.986   |
| ethylcarbamate       | 22.613  | 21.936  | 22.907    | 22.690   |
| formamide            | 20.680  | 19.779  | 20.752    | 20.520   |
| hexamine             | 22.941  | 21.716  | 23.847    | 23.820   |
| imidazole            | 23.551  | 22.423  | 23.572    | 23.468   |
| naphthalene          | 20.492  | 19.221  | 21.925    | 21.945   |
| $\alpha$ oxalic acid | 24.670  | 22.971  | 26.049    | 25.714   |
| $\beta$ oxalic acid  | 25.243  | 23.549  | 26.017    | 25.702   |
| pyrazine             | 16.360  | 15.017  | 16.757    | 16.651   |
| pyrazole             | 20.933  | 19.735  | 21.057    | 20.943   |
| succinic acid        | 34.256  | 32.926  | 34.677    | 34.446   |
| triazine             | 14.720  | 13.715  | 15.307    | 15.301   |
| trioxane             | 16.435  | 15.305  | 17.010    | 16.955   |
| uracil               | 34.493  | 33.054  | 35.480    | 35.191   |
| urea                 | 26.854  | 26.323  | 27.270    | 26.916   |
| MAE                  | 1.608   | 0.936   | 2.121     | 1.982    |
| ME                   | 1.543   | 0.497   | 2.098     | 1.953    |
| ice Ih               | 18.497  | 16.920  | 17.193    | 16.838   |
| ice II               | 17.736  | 16.233  | 16.744    | 16.437   |
| ice III              | 17.897  | 16.328  | 16.706    | 16.373   |
| ice IV               | 17.235  | 15.730  | 16.298    | 16.003   |
| ice VI               | 17.100  | 15.616  | 16.189    | 15.907   |
| ice VII              | 15.683  | 14.250  | 15.082    | 14.840   |
| ice VIII             | 15.937  | 14.535  | 15.358    | 15.114   |
| ice IX               | 18.031  | 16.486  | 16.870    | 16.536   |
| ice XI               | 18.568  | 16.988  | 17.257    | 16.902   |
| ice XIII             | 17.584  | 16.081  | 16.565    | 16.261   |
| ice XIV              | 17.420  | 15.914  | 16.423    | 16.128   |
| ice XV               | 17.100  | 15.616  | 16.189    | 15.907   |
| ice XVII             | 18.171  | 16.620  | 16.902    | 16.552   |
| MAE                  | 3.699   | 2.188   | 2.685     | 2.379    |
| ME                   | 3.699   | 2.188   | 2.685     | 2.379    |

Table S4: X23 and ICE13 lattice energies, in kcal/mol, computed with selected methods using fully relaxed geometries.

| Name                 | PBE-XDM | PBE-XDM | HSE06-XDM | PBE0-XDM | PBE50-XDM |
|----------------------|---------|---------|-----------|----------|-----------|
|                      | light   | tight   | light     | light    | light     |
| 1,4-cyclohexanedione | 19.743  | 20.397  | 19.653    | 19.816   | 20.101    |
| acetic acid          | 17.274  | 17.414  | 16.983    | 16.915   | 16.780    |
| adamantane           | 14.708  | 16.366  | 13.944    | 14.231   | 13.414    |
| ammonia              | 10.030  | 9.782   | 9.238     | 9.113    | 8.445     |
| anthracene           | 22.711  | 23.127  | 23.227    | 23.671   | 24.049    |
| benzene              | 11.554  | 11.917  | 11.468    | 11.666   | 11.550    |
| CO <sub>2</sub>      | 6.228   | 5.830   | 6.183     | 6.172    | 6.113     |
| cyanamide            | 21.025  | 21.378  | 20.088    | 19.962   | 19.237    |
| cytosine             | 36.787  | 36.695  | 36.728    | 36.700   | 36.777    |
| ethylcarbamate       | 19.978  | 20.352  | 19.537    | 19.480   | 19.119    |
| formamide            | 19.247  | 19.047  | 18.893    | 18.764   | 18.477    |
| hexamine             | 19.410  | 20.109  | 18.918    | 19.140   | 18.776    |
| imidazole            | 21.628  | 21.414  | 21.076    | 21.106   | 20.622    |
| naphthalene          | 16.893  | 17.333  | 17.149    | 17.475   | 17.630    |
| $\alpha$ oxalic acid | 22.459  | 21.863  | 23.074    | 22.927   | 23.807    |
| $\beta$ oxalic acid  | 23.122  | 22.522  | 23.147    | 22.995   | 23.434    |
| pyrazine             | 14.621  | 14.398  | 14.303    | 14.410   | 14.141    |
| pyrazole             | 18.908  | 18.648  | 18.441    | 18.475   | 18.098    |
| succinic acid        | 30.707  | 30.930  | 30.067    | 30.032   | 29.911    |
| triazine             | 13.350  | 13.375  | 13.271    | 13.444   | 13.536    |
| trioxane             | 14.092  | 14.172  | 13.788    | 13.896   | 13.788    |
| uracil               | 31.587  | 31.500  | 31.655    | 31.599   | 31.706    |
| urea                 | 24.549  | 24.909  | 24.481    | 24.280   | 24.241    |
| MAE                  | 1.135   | 1.043   | 1.203     | 1.143    | 1.253     |
| ME                   | -0.912  | -0.787  | -1.142    | -1.101   | -1.210    |
| ice Ih               | 17.898  | 16.605  | 16.500    | 16.181   | 15.419    |
| ice II               | 16.794  | 15.717  | 15.623    | 15.375   | 14.822    |
| ice III              | 17.140  | 15.935  | 15.801    | 15.512   | 14.802    |
| ice IV               | 16.247  | 15.213  | 15.098    | 14.872   | 14.372    |
| ice VI               | 16.055  | 15.065  | 14.930    | 14.716   | 14.224    |
| ice VII              | 14.462  | 13.628  | 13.574    | 13.428   | 13.235    |
| ice VIII             | 14.707  | 13.905  | 13.839    | 13.690   | 13.499    |
| ice IX               | 17.240  | 16.056  | 15.925    | 15.635   | 14.927    |
| ice XI               | 17.969  | 16.674  | 16.563    | 16.244   | 15.473    |
| ice XIII             | 16.627  | 15.569  | 15.419    | 15.175   | 14.589    |
| ice XIV              | 16.418  | 15.382  | 15.217    | 14.987   | 14.423    |
| ice XV               | 16.054  | 15.065  | 14.929    | 14.716   | 14.223    |
| ice XVII             | 17.578  | 16.306  | 16.217    | 15.903   | 15.174    |
| MAE                  | 2.794   | 1.711   | 1.597     | 1.351    | 0.793     |
| ME                   | 2.794   | 1.711   | 1.597     | 1.351    | 0.793     |

Table S5: X23 and ICE13 lattice energies, in kcal/mol, computed with selected methods using fully relaxed geometries.

| Name                 | B86bPBE-XDM | B86bPBE-XDM | B86bPBE25-XDM | B86bPBE50-XDM |
|----------------------|-------------|-------------|---------------|---------------|
|                      | light       | tight       | light         | light         |
| 1,4-cyclohexanedione | 20.329      | 21.544      | 20.252        | 20.358        |
| acetic acid          | 17.285      | 17.602      | 16.915        | 16.754        |
| adamantane           | 15.612      | 17.897      | 14.901        | 13.863        |
| ammonia              | 10.003      | 9.936       | 9.022         | 8.309         |
| anthracene           | 24.266      | 25.252      | 24.994        | 24.985        |
| benzene              | 12.074      | 12.779      | 12.115        | 11.871        |
| CO <sub>2</sub>      | 6.095       | 5.712       | 6.086         | 6.024         |
| cyanamide            | 20.916      | 21.413      | 19.953        | 19.253        |
| cytosine             | 37.400      | 37.771      | 37.226        | 37.142        |
| ethylcarbamate       | 20.155      | 20.819      | 19.582        | 19.151        |
| formamide            | 19.286      | 19.294      | 18.768        | 18.440        |
| hexamine             | 20.907      | 22.703      | 19.947        | 19.096        |
| imidazole            | 21.794      | 21.902      | 21.273        | 20.760        |
| naphthalene          | 17.952      | 18.846      | 18.391        | 18.289        |
| $\alpha$ oxalic acid | 22.794      | 22.440      | 23.161        | 23.868        |
| $\beta$ oxalic acid  | 23.418      | 23.066      | 23.198        | 23.468        |
| pyrazine             | 15.086      | 15.131      | 14.825        | 14.472        |
| pyrazole             | 19.130      | 19.156      | 18.666        | 18.237        |
| succinic acid        | 31.205      | 31.953      | 30.350        | 30.022        |
| triazine             | 13.722      | 13.950      | 13.802        | 13.846        |
| trioxane             | 14.808      | 15.272      | 14.282        | 13.930        |
| uracil               | 31.997      | 32.202      | 31.972        | 31.986        |
| urea                 | 24.683      | 25.336      | 24.288        | 24.166        |
| MAE                  | 0.825       | 0.715       | 0.812         | 1.064         |
| ME                   | -0.464      | 0.017       | -0.766        | -1.013        |
| ice Ih               | 17.529      | 16.360      | 15.835        | 15.128        |
| ice II               | 16.687      | 15.768      | 15.186        | 14.584        |
| ice III              | 16.884      | 15.812      | 15.244        | 14.548        |
| ice IV               | 16.216      | 15.364      | 14.723        | 14.146        |
| ice VI               | 16.062      | 15.252      | 14.592        | 14.008        |
| ice VII              | 14.707      | 14.140      | 13.417        | 13.041        |
| ice VIII             | 14.957      | 14.418      | 13.679        | 13.304        |
| ice IX               | 16.991      | 15.946      | 15.373        | 14.677        |
| ice XI               | 17.600      | 16.429      | 15.897        | 15.182        |
| ice XIII             | 16.533      | 15.631      | 14.998        | 14.362        |
| ice XIV              | 16.371      | 15.499      | 14.835        | 14.202        |
| ice XV               | 16.062      | 15.252      | 14.592        | 14.008        |
| ice XVII             | 17.232      | 16.083      | 15.570        | 14.887        |
| MAE                  | 2.689       | 1.776       | 1.159         | 0.554         |
| ME                   | 2.689       | 1.776       | 1.159         | 0.554         |

Table S6: X23 and ICE13 lattice energies, in kcal/mol, computed with selected methods using GGA/light (PBE-MBD or PBE-XDM) geometries.

| Name                 | PBE-MBD | PBE0-MBD | PBE-XDM | PBE0-XDM | PBE50-XDM |
|----------------------|---------|----------|---------|----------|-----------|
|                      | tight   | light    | tight   | light    | light     |
| 1,4-cyclohexanedione | 22.093  | 23.778   | 20.364  | 19.986   | 20.506    |
| acetic acid          | 18.408  | 19.111   | 17.413  | 16.991   | 16.975    |
| adamantane           | 19.145  | 19.551   | 16.281  | 14.430   | 13.896    |
| ammonia              | 10.274  | 10.238   | 9.764   | 9.144    | 8.536     |
| anthracene           | 25.692  | 29.750   | 23.116  | 23.977   | 24.713    |
| benzene              | 13.081  | 14.522   | 11.896  | 11.812   | 11.869    |
| CO <sub>2</sub>      | 5.651   | 6.746    | 5.852   | 6.270    | 6.377     |
| cyanamide            | 22.265  | 21.545   | 21.411  | 19.870   | 19.006    |
| cytosine             | 38.782  | 40.945   | 36.734  | 36.829   | 37.030    |
| ethylcarbamate       | 21.955  | 22.725   | 20.340  | 19.601   | 19.435    |
| formamide            | 19.794  | 20.513   | 19.051  | 18.815   | 18.585    |
| hexamine             | 21.722  | 23.845   | 20.094  | 19.369   | 19.319    |
| imidazole            | 22.426  | 23.441   | 21.387  | 21.184   | 20.755    |
| naphthalene          | 19.236  | 21.953   | 17.316  | 17.693   | 18.109    |
| $\alpha$ oxalic acid | 22.986  | 25.657   | 21.882  | 23.020   | 23.923    |
| $\beta$ oxalic acid  | 23.561  | 25.592   | 22.544  | 23.024   | 23.328    |
| pyrazine             | 15.028  | 16.678   | 14.397  | 14.554   | 14.483    |
| pyrazole             | 19.752  | 20.908   | 18.658  | 18.549   | 18.237    |
| succinic acid        | 32.934  | 34.351   | 30.912  | 30.083   | 29.932    |
| triazine             | 13.728  | 15.336   | 13.392  | 13.610   | 13.943    |
| trioxane             | 15.310  | 17.008   | 14.173  | 14.075   | 14.209    |
| uracil               | 33.074  | 35.205   | 31.518  | 31.781   | 32.117    |
| urea                 | 26.387  | 26.972   | 24.976  | 24.394   | 24.539    |
| MAE                  | 0.936   | 1.972    | 1.050   | 1.013    | 1.002     |
| ME                   | 0.509   | 1.947    | -0.787  | -0.979   | -0.946    |
| ice Ih               | 16.908  | 16.551   | 16.594  | 15.896   | 14.413    |
| ice II               | 16.222  | 16.192   | 15.709  | 15.138   | 13.971    |
| ice III              | 16.322  | 16.101   | 15.928  | 15.249   | 13.861    |
| ice IV               | 15.725  | 15.764   | 15.210  | 14.644   | 13.538    |
| ice VI               | 15.612  | 15.677   | 15.063  | 14.499   | 13.424    |
| ice VII              | 14.248  | 14.632   | 13.630  | 13.245   | 12.521    |
| ice VIII             | 14.533  | 14.903   | 13.907  | 13.507   | 12.787    |
| ice IX               | 16.476  | 16.270   | 16.042  | 15.375   | 14.003    |
| ice XI               | 16.977  | 16.615   | 16.665  | 15.960   | 14.471    |
| ice XIII             | 16.075  | 16.017   | 15.565  | 14.940   | 13.735    |
| ice XIV              | 15.910  | 15.890   | 15.379  | 14.759   | 13.591    |
| ice XV               | 15.612  | 15.678   | 15.063  | 14.498   | 13.423    |
| ice XVII             | 16.605  | 16.267   | 16.292  | 15.620   | 14.178    |
| MAE                  | 2.181   | 2.130    | 1.706   | 1.112    | 0.253     |
| ME                   | 2.181   | 2.130    | 1.706   | 1.112    | -0.074    |

Table S7: X23 and ICE13 lattice energies, in kcal/mol, computed with selected methods using B86bPBE-XDM/light geometries.

| Name                 | B86bPBE-XDM | B86bPBE25-XDM | B86bPBE50-XDM |
|----------------------|-------------|---------------|---------------|
|                      | tight       | light         | light         |
| 1,4-cyclohexanedione | 21.447      | 20.494        | 20.979        |
| acetic acid          | 17.593      | 17.031        | 17.067        |
| adamantane           | 17.734      | 15.173        | 14.512        |
| ammonia              | 9.906       | 9.058         | 8.413         |
| anthracene           | 25.182      | 25.380        | 25.911        |
| benzene              | 12.706      | 12.298        | 12.309        |
| CO <sub>2</sub>      | 5.733       | 6.216         | 6.382         |
| cyanamide            | 21.436      | 19.941        | 19.230        |
| cytosine             | 37.770      | 37.436        | 37.649        |
| ethylcarbamate       | 20.780      | 19.761        | 19.621        |
| formamide            | 19.291      | 18.846        | 18.632        |
| hexamine             | 22.589      | 20.232        | 19.801        |
| imidazole            | 21.836      | 21.392        | 21.012        |
| naphthalene          | 18.776      | 18.667        | 18.965        |
| $\alpha$ oxalic acid | 22.446      | 23.328        | 24.246        |
| $\beta$ oxalic acid  | 23.070      | 23.314        | 23.657        |
| pyrazine             | 15.112      | 15.017        | 14.946        |
| pyrazole             | 19.149      | 18.785        | 18.508        |
| succinic acid        | 31.870      | 30.516        | 30.397        |
| triazine             | 13.966      | 14.015        | 14.394        |
| trioxane             | 15.243      | 14.516        | 14.501        |
| uracil               | 32.202      | 32.221        | 32.600        |
| urea                 | 25.393      | 24.428        | 24.541        |
| MAE                  | 0.710       | 0.657         | 0.695         |
| ME                   | -0.015      | -0.588        | -0.579        |
| ice Ih               | 16.352      | 15.561        | 14.160        |
| ice II               | 15.763      | 14.958        | 13.763        |
| ice III              | 15.806      | 14.990        | 13.638        |
| ice IV               | 15.362      | 14.506        | 13.349        |
| ice VI               | 15.252      | 14.380        | 13.232        |
| ice VII              | 14.142      | 13.246        | 12.373        |
| ice VIII             | 14.429      | 13.510        | 12.641        |
| ice IX               | 15.932      | 15.124        | 13.787        |
| ice XI               | 16.422      | 15.625        | 14.220        |
| ice XIII             | 15.629      | 14.771        | 13.536        |
| ice XIV              | 15.499      | 14.615        | 13.397        |
| ice XV               | 15.252      | 14.380        | 13.232        |
| ice XVII             | 16.072      | 15.296        | 13.925        |
| MAE                  | 1.772       | 0.930         | 0.315         |
| ME                   | 1.772       | 0.930         | -0.278        |

Table S8: X23 and ICE13 lattice energies, in kcal/mol, computed with selected composite methods involving basis-set correction using GGA/light (PBE-MBD, PBE-XDM, or B86bPBE-XDM) geometries.

| Name                 | PBE0-MBD | PBE0-XDM | PBE50-XDM | B86bPBE25-XDM | B86bPBE50-XDM |
|----------------------|----------|----------|-----------|---------------|---------------|
| 1,4-cyclohexanedione | 22.949   | 20.607   | 21.127    | 21.612        | 22.096        |
| acetic acid          | 18.449   | 17.130   | 17.114    | 17.339        | 17.375        |
| adamantane           | 19.625   | 16.003   | 15.469    | 17.294        | 16.633        |
| ammonia              | 9.535    | 8.878    | 8.270     | 8.961         | 8.316         |
| anthracene           | 27.904   | 24.382   | 25.118    | 26.296        | 26.827        |
| benzene              | 13.762   | 12.154   | 12.211    | 12.931        | 12.941        |
| CO <sub>2</sub>      | 5.883    | 5.894    | 6.000     | 5.854         | 6.021         |
| cyanamide            | 21.247   | 20.256   | 19.392    | 20.461        | 19.750        |
| cytosine             | 39.389   | 36.776   | 36.978    | 37.806        | 38.019        |
| ethylcarbamate       | 22.070   | 19.963   | 19.797    | 20.386        | 20.246        |
| formamide            | 19.626   | 18.619   | 18.389    | 18.851        | 18.636        |
| hexamine             | 22.626   | 20.053   | 20.003    | 21.914        | 21.482        |
| imidazole            | 22.316   | 20.943   | 20.514    | 21.433        | 21.053        |
| naphthalene          | 20.698   | 18.115   | 18.531    | 19.491        | 19.788        |
| $\alpha$ oxalic acid | 23.973   | 22.443   | 23.346    | 22.981        | 23.898        |
| $\beta$ oxalic acid  | 23.909   | 22.445   | 22.749    | 22.966        | 23.310        |
| pyrazine             | 15.345   | 14.329   | 14.259    | 15.043        | 14.972        |
| pyrazole             | 19.727   | 18.299   | 17.987    | 18.805        | 18.527        |
| succinic acid        | 33.029   | 30.288   | 30.137    | 31.182        | 31.063        |
| triazine             | 14.343   | 13.652   | 13.984    | 14.259        | 14.638        |
| trioxane             | 15.882   | 14.157   | 14.291    | 14.951        | 14.936        |
| uracil               | 33.787   | 31.713   | 32.049    | 32.426        | 32.805        |
| urea                 | 26.504   | 24.821   | 24.965    | 25.138        | 25.250        |
| MAE                  | 1.068    | 0.959    | 0.871     | 0.480         | 0.530         |
| ME                   | 0.913    | -0.855   | -0.822    | -0.139        | -0.130        |
| ice Ih               | 14.963   | 14.592   | 13.109    | 14.383        | 12.983        |
| ice II               | 14.678   | 14.053   | 12.886    | 14.034        | 12.838        |
| ice III              | 14.526   | 14.037   | 12.649    | 13.912        | 12.560        |
| ice IV               | 14.254   | 13.607   | 12.501    | 13.651        | 12.495        |
| ice VI               | 14.189   | 13.507   | 12.433    | 13.570        | 12.422        |
| ice VII              | 13.197   | 12.413   | 11.689    | 12.681        | 11.808        |
| ice VIII             | 13.499   | 12.707   | 11.987    | 12.982        | 12.113        |
| ice IX               | 14.716   | 14.177   | 12.805    | 14.065        | 12.727        |
| ice XI               | 15.025   | 14.656   | 13.167    | 14.448        | 13.042        |
| ice XIII             | 14.509   | 13.878   | 12.673    | 13.868        | 12.632        |
| ice XIV              | 14.379   | 13.721   | 12.552    | 13.743        | 12.525        |
| ice XV               | 14.189   | 13.506   | 12.431    | 13.571        | 12.422        |
| ice XVII             | 14.701   | 14.333   | 12.891    | 14.136        | 12.765        |
| MAE                  | 0.612    | 0.305    | 1.161     | 0.190         | 1.195         |
| ME                   | 0.612    | 0.024    | -1.161    | 0.013         | -1.195        |
